# Supplementary material for: The caudate nucleus undergoes dramatic and unique transcriptional changes in human prodromal Huntington’s disease brain
Source: PubMed Central journal article supplement (PMC6796419; doi:10.1186/s12920-019-0581-9), 2019-10-16
Supplement: 12920_2019_581_MOESM2_ESM.pdf [file 12920_2019_581_MOESM2_ESM.pdf]

## Additional File 2 - PCA of gene counts

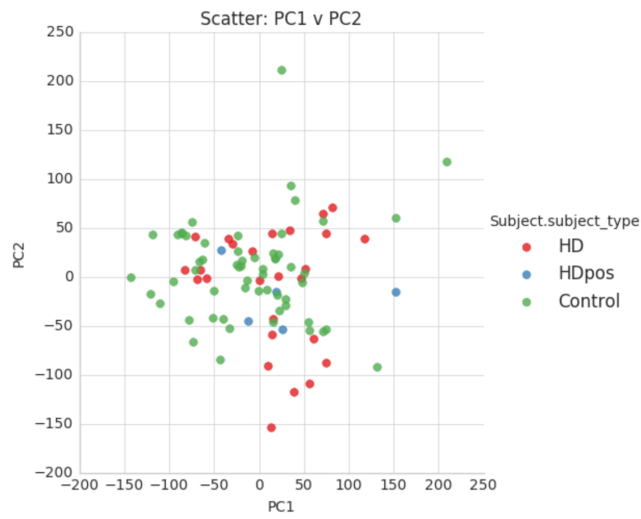

**Figure 1.** PCA identified no outliers that exerted a strong influence on the results in the first two components.

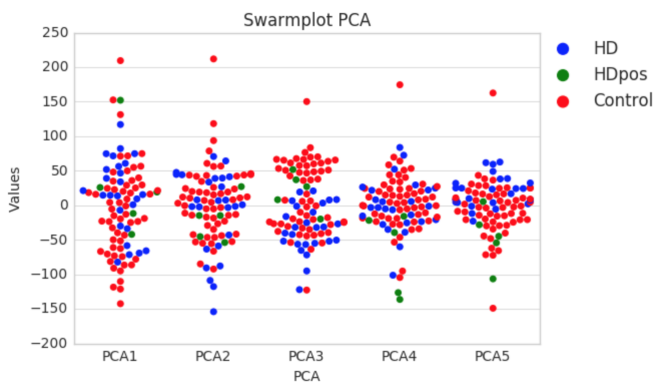

**Figure 2.** PCA swarm plot of the first five components by % explained variance. No strong outliers were removed based on these projections.
